# Supplementary material
Source: PubMed Central journal article supplement (PMC1305646)
Supplement: biophysj_104.054650_1.pdf [file biophysj_104.054650_1.pdf]

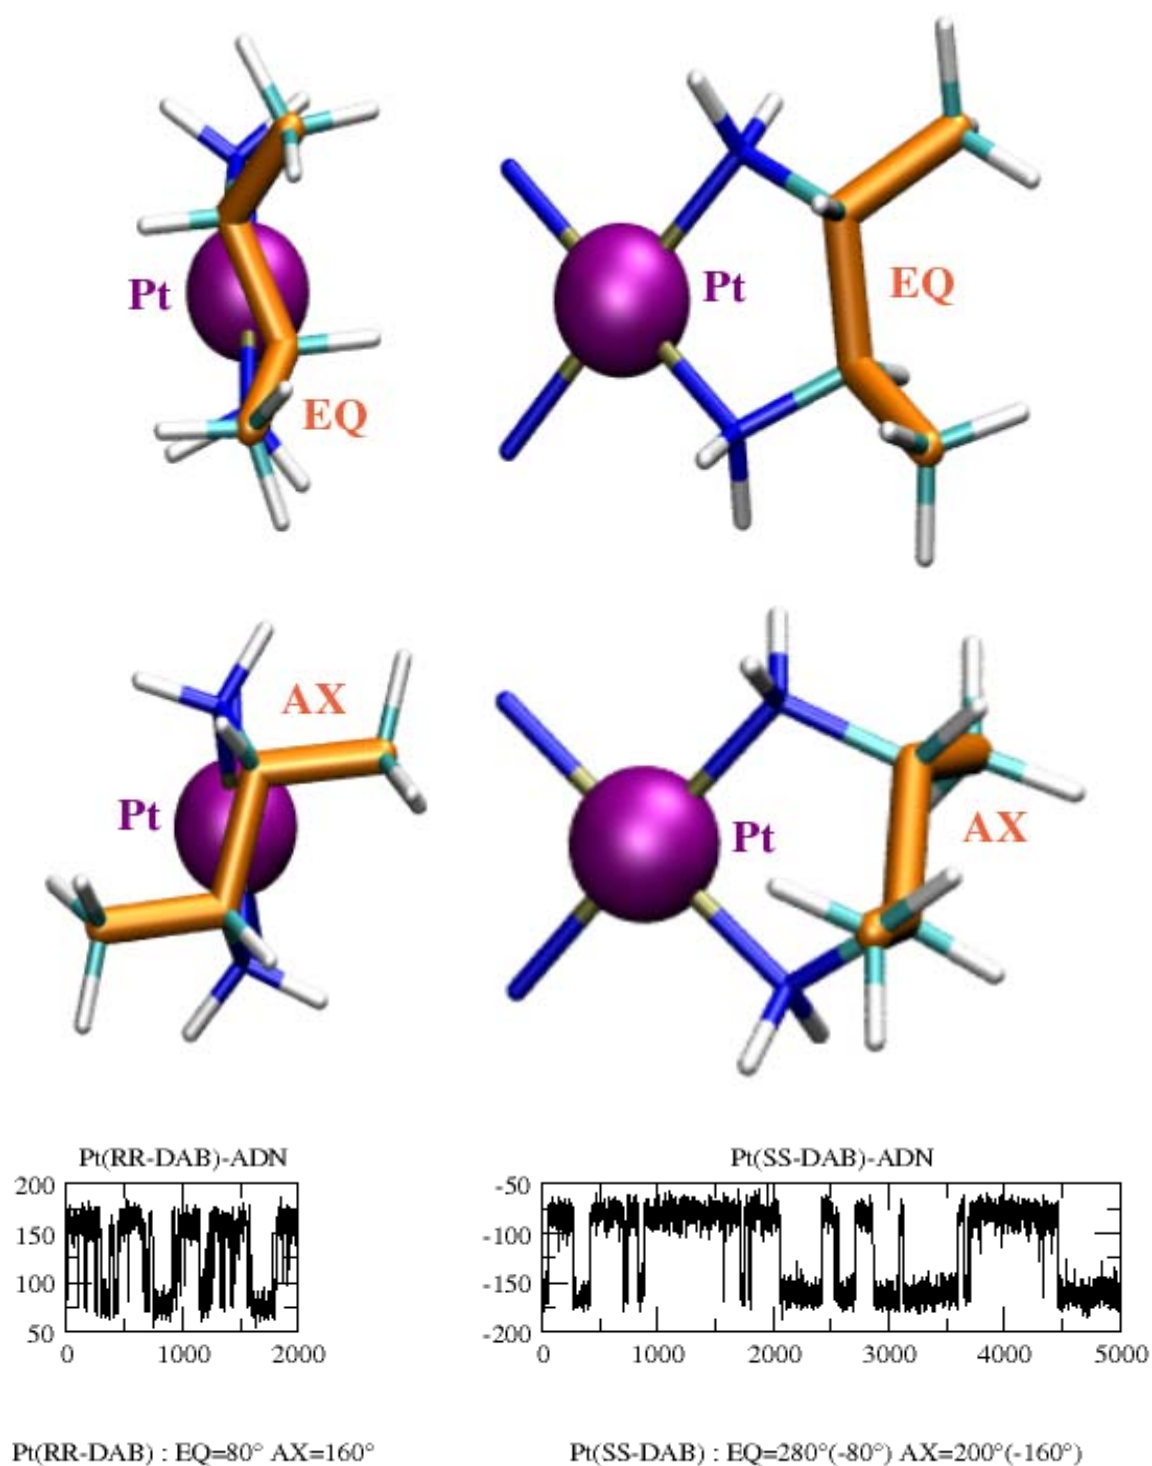

**Figure S1.** Conformational equilibria of the  $\text{Pt}(\text{DAB})^{2+}$  moiety. A: Two stable conformations of the five-membered ring of the complex  $[\text{PtCl}_2(\text{R,R-DAB})]$ . Top, two views of the conformation with equatorial positions of the methyl groups. Bottom, two views of the conformation with axial positions of the methyl groups. B: Plot of the C-C-C-C dihedral angle (along the bonds shown in orange thick sticks) in the  $\text{Pt}(\text{R,R-DAB})^{2+}$ -**TGGT** (left) and  $\text{Pt}(\text{S,S-DAB})^{2+}$ -**TGGT** (left) adducts as a function of the simulation time. The equatorial-axial transitions were less frequent in the case of the  $\text{Pt}(\text{S,S-DAB})^{2+}$ -**TGGT** adduct, therefore, a longer simulation was necessary for an equivalent sampling.

**Table S1** : Protocol for MD simulation of the intrastrand crosslink Pt(DAB)-DNA. Groups definitions : A = DNA (platinum-DNA adduct), B= counter ions, C = all Watson-Crick hydrogen bonds (WC) and D = terminal WC. Additional harmonic restraint on dihedral angles alpha (reference value : 180°) and gamma (reference value : 180°) of 5' platinated guanine during the first nine equilibration steps for alpha *trans*/gamma *trans* restrained DM simulations (2ns production period).

| Stage            | Time (ps) | Harmonic restraints on cartesian coordinates                            | Distances restraints | Remarks              |
|------------------|-----------|-------------------------------------------------------------------------|----------------------|----------------------|
| Heating 1        | 5         | 25Kcal.mol-1 on A, 25Kcal.mol-1 on B                                    | 25Kcal.mol-1 on C    | 0K-150K              |
| Heating 2        | 5         | 25Kcal.mol-1 on A, 25Kcal.mol-1 on B                                    | 25Kcal.mol-1 on C    | 150K-300K            |
| Equilibration 1  | 5         | 25Kcal.mol-1 on A, 25Kcal.mol-1 on B                                    | 25Kcal.mol-1 on C    |                      |
| Equilibration 2  | 2,5       | 25Kcal.mol-1 on A, 25Kcal.mol-1 on B                                    | 25Kcal.mol-1 on C    | Switch to constant P |
| Equilibration 3  | 5         | 20Kcal.mol-1 on A, 15Kcal.mol-1 on B                                    | 25Kcal.mol-1 on C    |                      |
| Equilibration 4  | 2,5       | 15Kcal.mol-1 on A, 10Kcal.mol-1 on B                                    | 25Kcal.mol-1 on C    |                      |
| Equilibration 5  | 2,5       | 10Kcal.mol-1 on A, 5Kcal.mol-1 on B                                     | 25Kcal.mol-1 on C    |                      |
| Equilibration 6  | 2,5       | 5Kcal.mol-1 on A, 2,5Kcal.mol-1 on B                                    | 25Kcal.mol-1 on C    |                      |
| Equilibration 7  | 10        | 2,5Kcal.mol-1 on A                                                      | 25Kcal.mol-1 on C    |                      |
| Equilibration 8  | 20        |                                                                         | 25Kcal.mol-1 on C    |                      |
| Re-distribution  | 0,002     | Redistribution of the velocities according to a Maxwellian distribution |                      |                      |
| Equilibration 9  | 20        |                                                                         | 25Kcal.mol-1 on D    |                      |
| Re-distribution  | 0,002     | Redistribution of the velocities according to a Maxwellian distribution |                      |                      |
| Equilibration 10 | 20        |                                                                         | 25Kcal.mol-1 on D    |                      |
| Re-distribution  | 0,002     | Redistribution of the velocities according to a Maxwellian distribution |                      |                      |
| Production       | 5000      |                                                                         | 25Kcal.mol-1 on D    |                      |
